# Supplementary material for: Phylogenetic position of the extinct blue antelope, Hippotragus leucophaeus (Pallas, 1766) (Bovidae: Hippotraginae), based on complete mitochondrial genomes
Source: Oxford University Press journal article supplement (doi:10.1093/zoolinnean/zlx034), 2017-05-11
Supplement: zlx034_suppl_supplementary_material.pdf [file zlx034_suppl_supplementary_material.pdf]

Supplementary Figure 1 – Misincorporation plot for collapsed mapped reads of Hleuco4 to the *Hippotragus niger* mitochondrial genome, generated with mapDamage 2.0. Top plots show the base frequency outside and in the read, delimited by the open grey box. The bottom plots are the position specific substitutions from the 5'' (left) and the 3'' end (right). Guanine to adenine and cytosine to thymine are reported in blue and red, respectively, with all other possible misincorporations represented in grey.

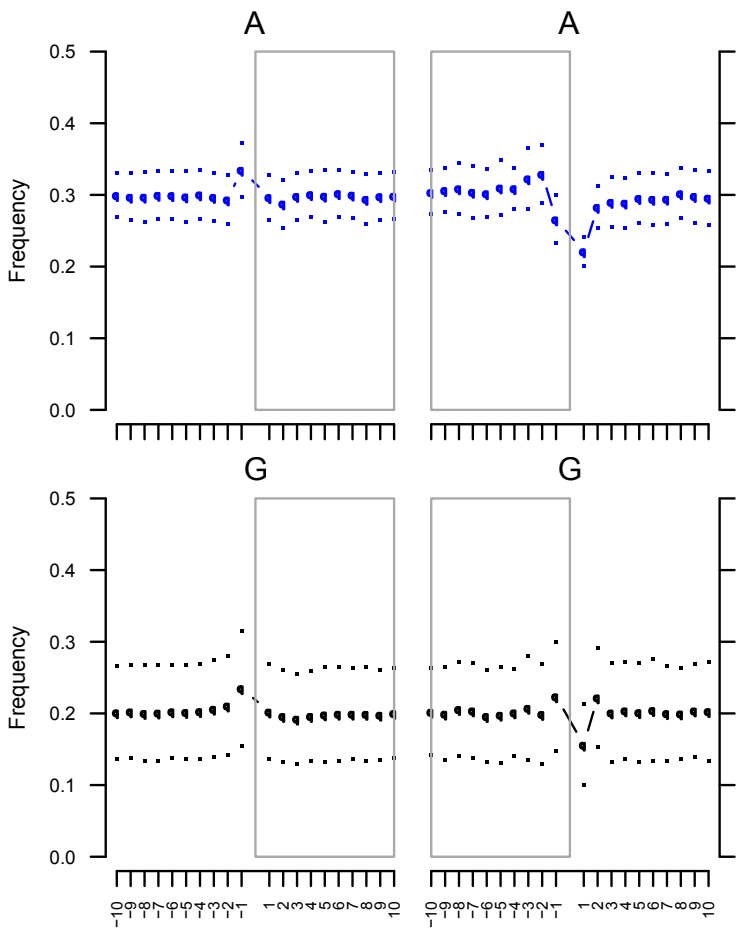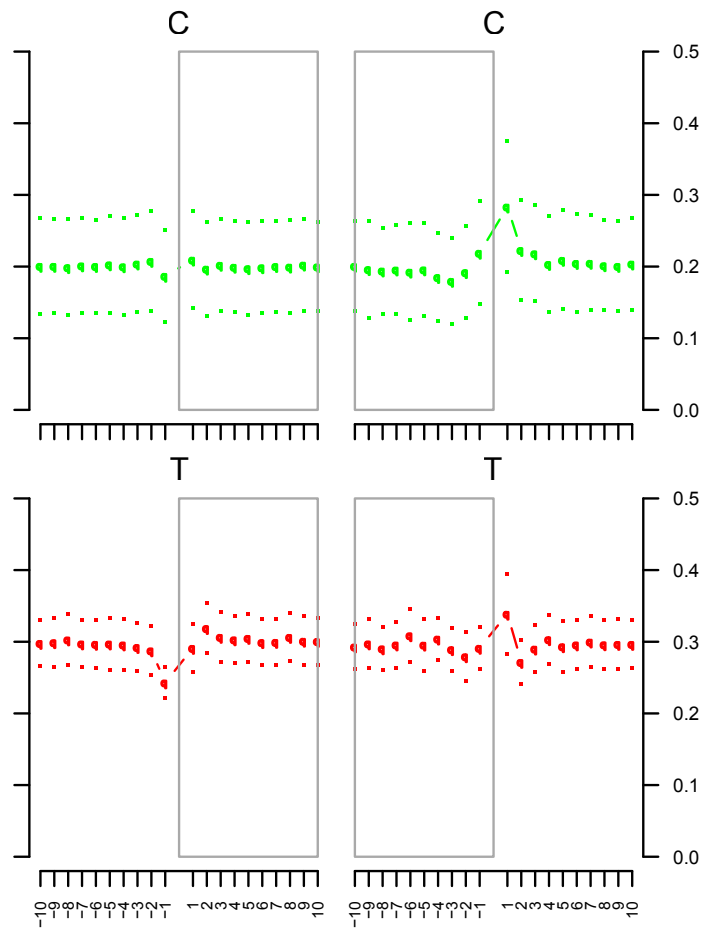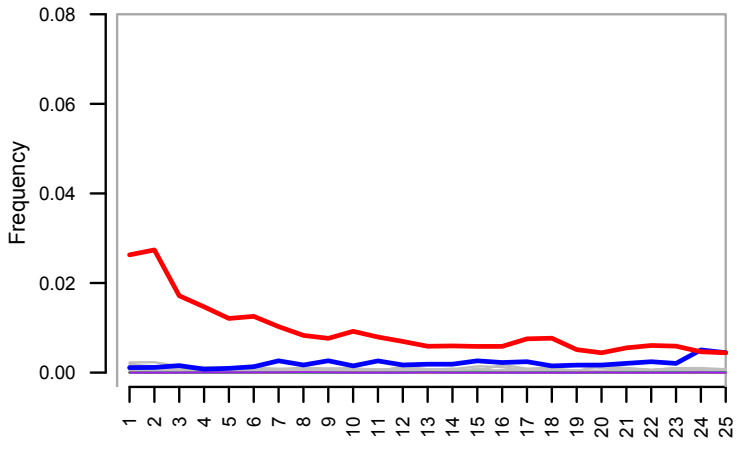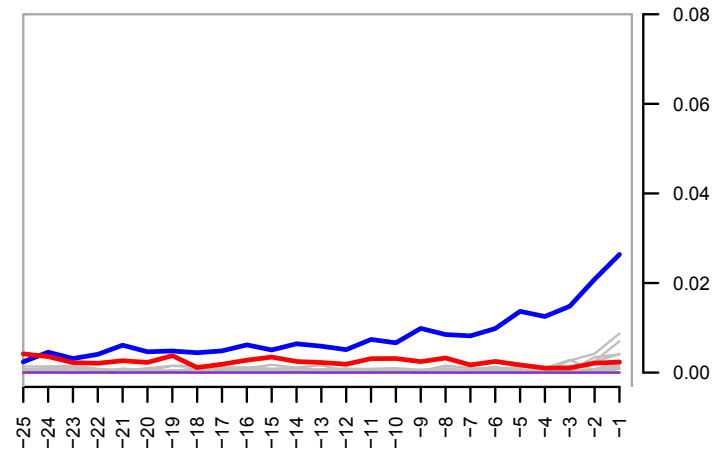

Supplementary Figure 2 – Cytochrome B phylogenetic tree of 25 individuals from 14 species of antelopes, calculated using Neighbor-Joining (A), Maximum Likelihood (B), and Bayesian inference (C). Branch labels indicate bootstrap support (A and B) or posterior probabilities (C). See text for details.

**A**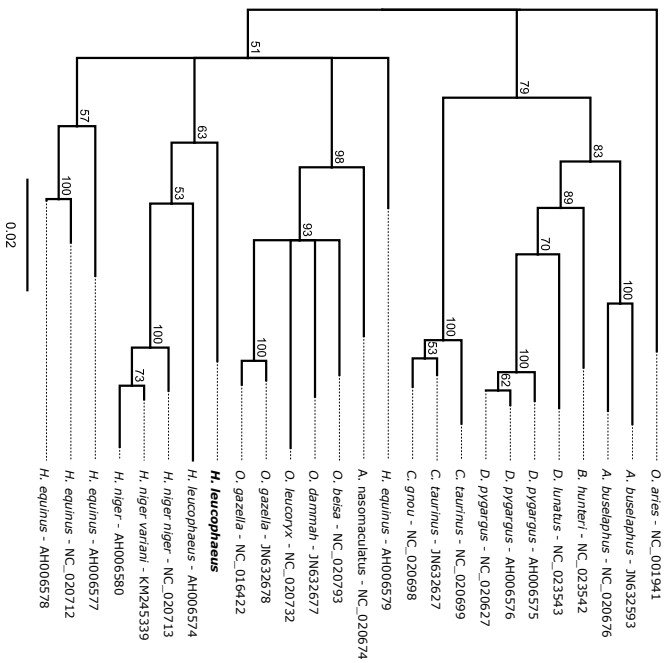**B**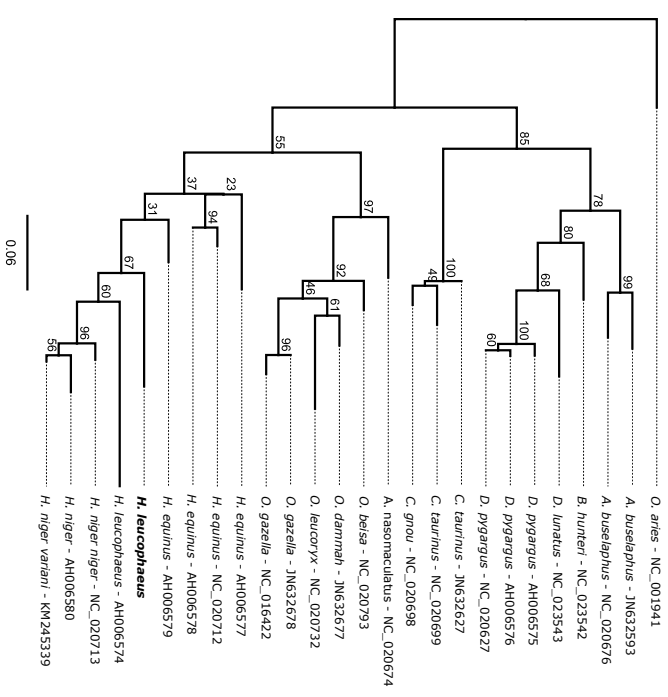**C**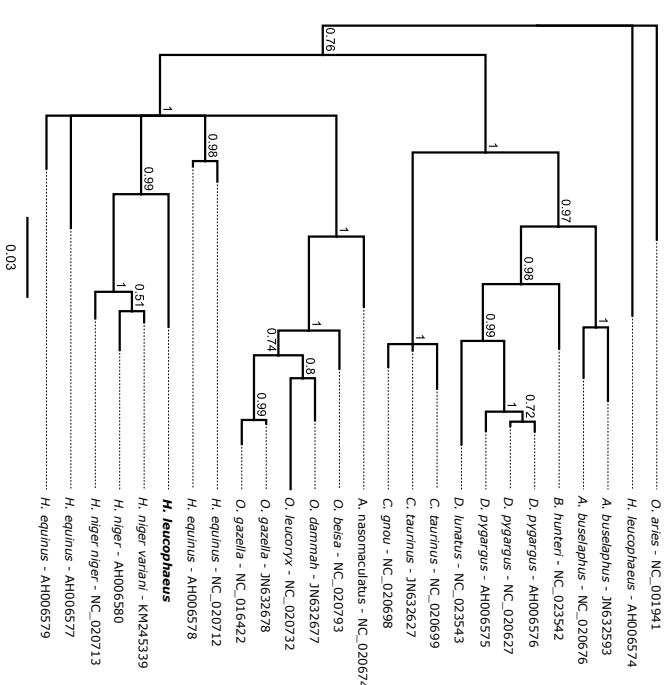

Supplementary table 1 - Ka/Ks ratio between the mitochondrial genome of *Hippotragus leucophaeus* and other species of Hippotraginae and Alcelaphinae with publicly available mitochondrial genomes, calculated in DNAsp v5.0.

| <i>Hippotragus leucophaeus</i> vs. | Ka/Ks ratio |
|------------------------------------|-------------|
| <b>Subfamily / species</b>         |             |
| <b>Hippotraginae</b>               |             |
| <i>Addax nasomaculatus</i>         | 0.058       |
| <i>Hippotragus niger</i>           | 0.053       |
| <i>H. n. variani</i>               | 0.051       |
| <i>H. equinus</i>                  | 0.045       |
| <i>Oryx beisa</i>                  | 0.040       |
| <i>O. dammah</i>                   | 0.058       |
| <i>O. gazella</i>                  | 0.050       |
| <i>O. leucoryx</i>                 | 0.040       |
| <b>Alcelaphinae</b>                |             |
| <i>Alcelaphus buselaphus</i>       | 0.040       |
| <i>Connochaetes gnou</i>           | 0.038       |
| <i>C. taurinus</i>                 | 0.038       |
| <i>Damaliscus pygargus</i>         | 0.040       |

Supplementary Table 2 - Synapomorphies supporting *H. leucophaeus* grouping with *H. niger* (including *H. n. variani*). Gene, position in relation to the mitochondrial sequence of *H. niger* (NC\_020713), and type of substitution in relation to other Hippotraginae and Alcelaphinae (ancestral -> derived).

| Gene     | Position | Substitution |
|----------|----------|--------------|
| 16S      | 1523     | T -> C       |
| 16S      | 1647     | T -> C       |
| 16S      | 1808     | A -> G       |
| 16S      | 1811     | A -> C       |
| 16S      | 1839     | T -> C       |
| 16S      | 1844     | C -> T       |
| ND1      | 2794     | C -> T       |
| ND1      | 2851     | G -> C       |
| ND1      | 3502     | A -> T       |
| tRNA-Ile | 3741     | T -> C       |
| tRNA-Gln | 3781     | C -> A       |
| ND2      | 3916     | T -> C       |
| ND2      | 4391     | C -> A       |
| ND2      | 4483     | T -> C       |
| ND2      | 4790     | T -> C       |
| tRNA-Ala | 5039     | A -> G       |
| COX1     | 6208     | A -> C       |
| COX1     | 6259     | C -> T       |
| COX1     | 6409     | T -> C       |
| COX1     | 6475     | T -> C       |
| COX1     | 6515     | C -> T       |
| ATP8     | 7906     | C -> A       |
| ATP6     | 8182     | A -> G       |
| ATP6     | 8422     | T -> C       |
| ATP6     | 8533     | C -> T       |
| COX3     | 8616     | C -> G       |
| COX3     | 8922     | C -> T       |
| COX3     | 9013     | C -> T       |
| COX3     | 9312     | C -> T       |
| tRNA-Gly | 9403     | T -> C       |
| ND3      | 9766     | C -> T       |
| ND4L     | 10000    | A -> G       |
| ND4L     | 10157    | C -> T       |
| ND4      | 10230    | C -> A       |
| ND4      | 10323    | A -> G       |
| ND4      | 10359    | A -> G       |
| ND4      | 10389    | A -> G       |
| ND4      | 10452    | C -> T       |
| ND4      | 10745    | T -> C       |
| ND4      | 10924    | G -> A       |
| ND4      | 11085    | C -> T       |
| ND4      | 11090    | T -> C       |
| ND4      | 11099    | C -> T       |
| ND4      | 11136    | A -> G       |
| ND4      | 11322    | A -> G       |

|          |       |      |
|----------|-------|------|
| ND4      | 11499 | C->A |
| tRNA-Ser | 11642 | C->T |
| tRNA-Leu | 11685 | A->C |
| ND5      | 12393 | A->T |
| ND5      | 12612 | C->T |
| ND5      | 13062 | T->C |
| ND5      | 13063 | A->T |
| ND5      | 13125 | C->T |
| ND6      | 13775 | C->T |
| ND6      | 13815 | T->C |
| ND6      | 13910 | T->C |
| ND6      | 13979 | C->T |
| CYTB     | 14348 | C->T |
| CYTB     | 14381 | C->T |
| CYTB     | 14475 | G->A |
| CYTB     | 15116 | T->C |
| CYTB     | 15255 | A->T |
| tRNA-Pro | 15375 | C->A |

---

Supplementary Table 3 - Number of sequencing reads generated in this study from a DNA sample of *H. leucophaeus* and that mapped to the nuclear genome of *Ovis aries* and *Bos taurus*, for each chromosome.

| <b>Chromosome</b> | <b><i>Ovis aries</i></b> | <b><i>Bos taurus</i></b> |
|-------------------|--------------------------|--------------------------|
| 1                 | 101,262                  | 33,603                   |
| 2                 | 91,567                   | 30,394                   |
| 3                 | 78,104                   | 25,960                   |
| 4                 | 44,288                   | 26,255                   |
| 5                 | 38,396                   | 24,402                   |
| 6                 | 42,850                   | 24,117                   |
| 7                 | 36,671                   | 22,599                   |
| 8                 | 34,974                   | 23,875                   |
| 9                 | 35,618                   | 22,791                   |
| 10                | 30,880                   | 22,490                   |
| 11                | 17,881                   | 21,431                   |
| 12                | 27,321                   | 17,358                   |
| 13                | 27,552                   | 16,206                   |
| 14                | 18,790                   | 18,229                   |
| 15                | 27,552                   | 15,731                   |
| 16                | 25,235                   | 15,671                   |
| 17                | 24,525                   | 13,902                   |
| 18                | 22,550                   | 11,446                   |
| 19                | 19,921                   | 10,463                   |
| 20                | 16,260                   | 14,151                   |
| 21                | 14,217                   | 13,430                   |
| 22                | 16,613                   | 11,678                   |
| 23                | 21,956                   | 9,625                    |
| 24                | 11,543                   | 12,442                   |
| 25                | 14,099                   | 6,727                    |
| 26                | 14,920                   | 9,751                    |
| 27                | NA                       | 8,478                    |
| 28                | NA                       | 8,301                    |
| 29                | NA                       | 7,930                    |
| X                 | 28,248                   | 17,168                   |
| <b>Total</b>      | <b>883,793</b>           | <b>516,604</b>           |
